# Supplementary material for: Cognitive tasks propagate the neural entrainment in response to a visual 40 Hz stimulation in humans
Source: Frontiers journal article supplement (doi:10.3389/fnagi.2022.1010765), 2022-10-06
Supplement: Data_Sheet_1.PDF [file Data_Sheet_1.PDF]

# Supplementary Material

## 1 SUPPLEMENTARY FIGURES

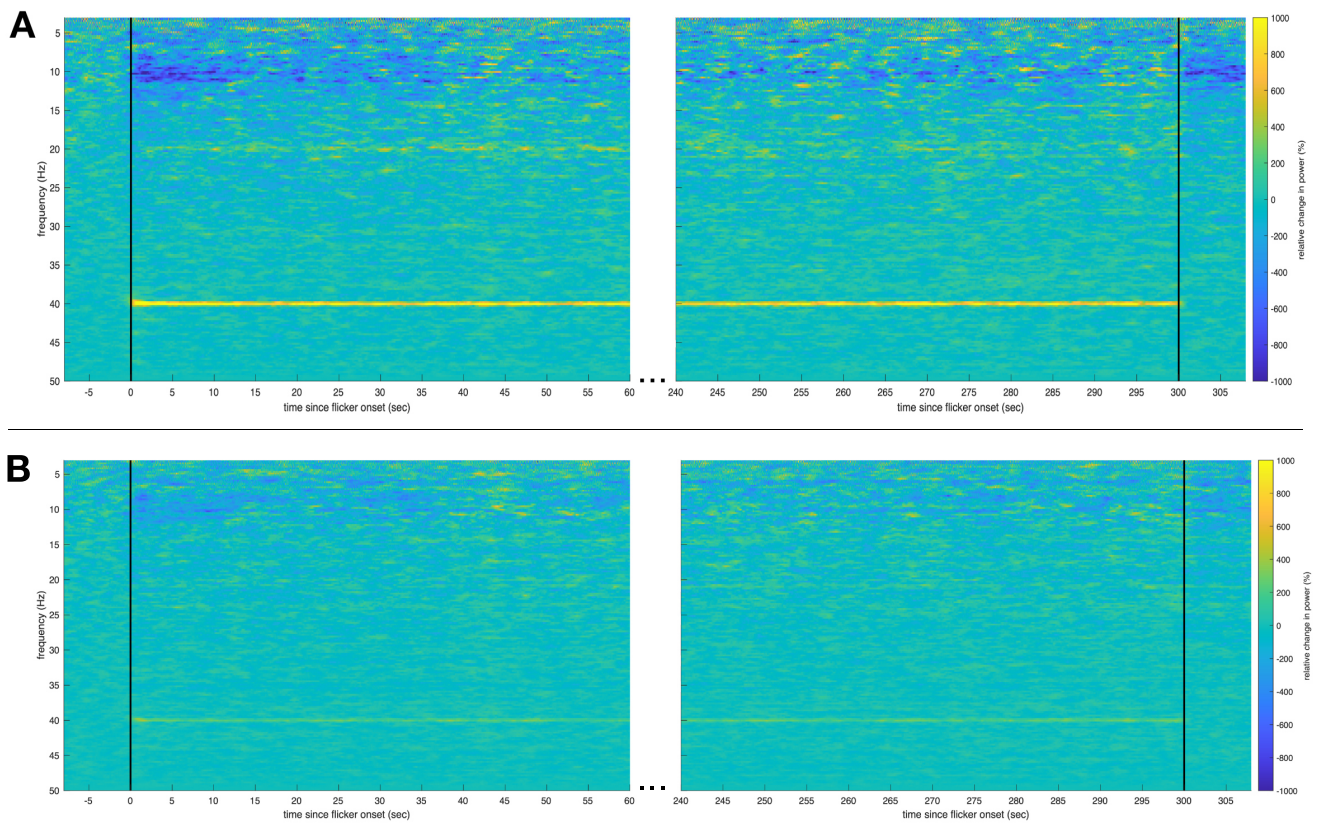

**Figure S1.** Time frequency analysis of the no-task condition with regular flickering at channel (A) Oz and (B) CPz

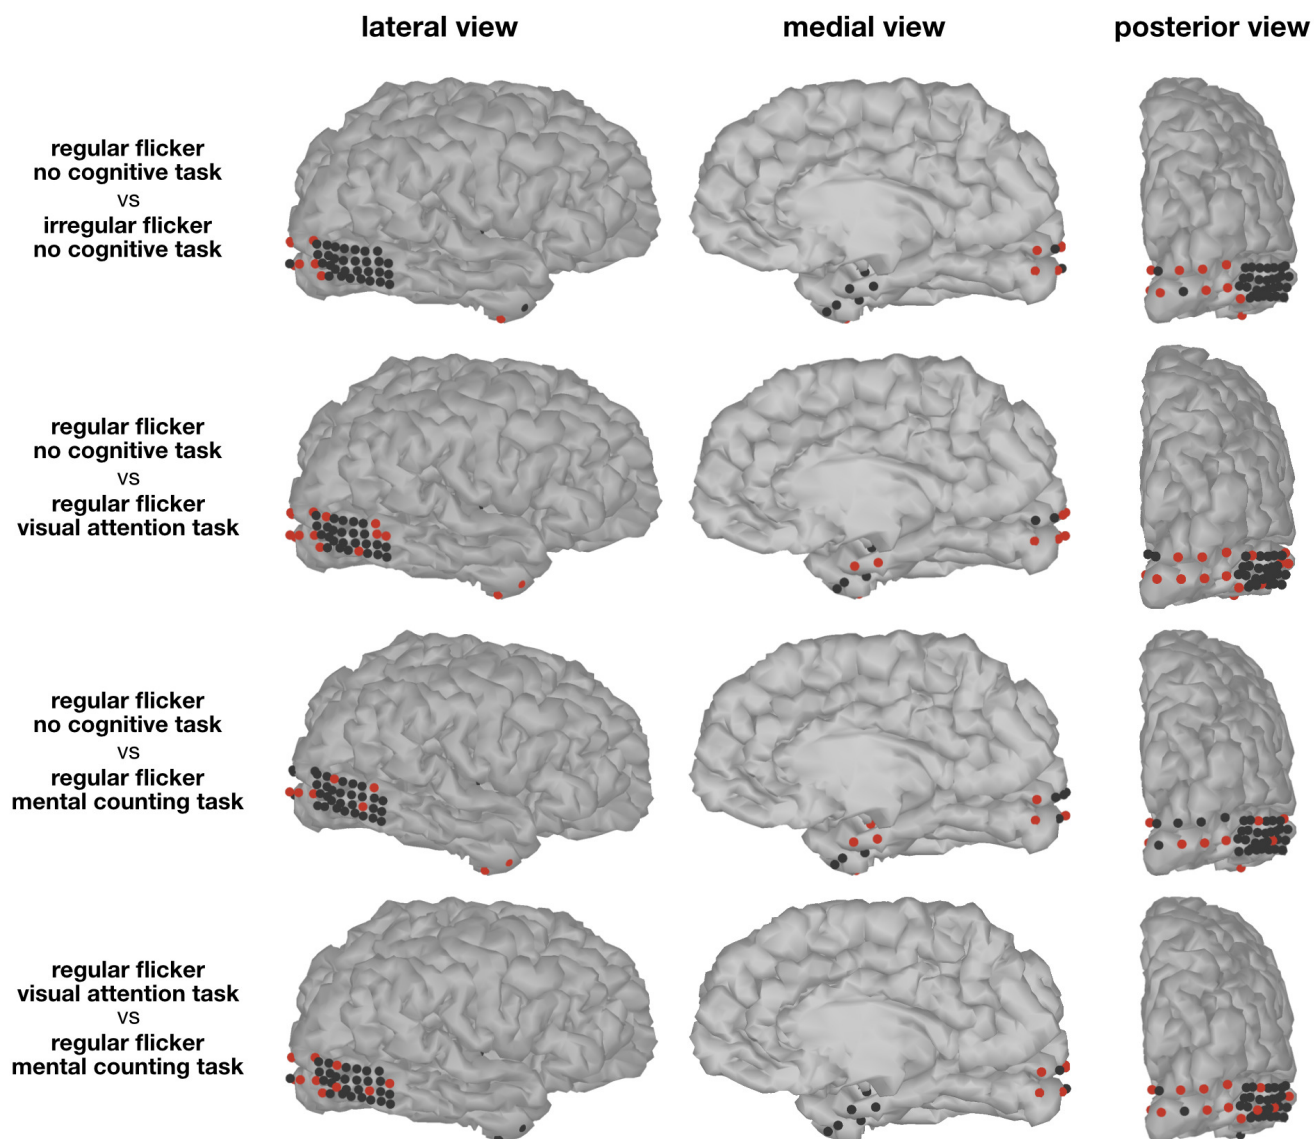

**Figure S2.** The results of multiple comparison on individual electrode of ECoG grids. The electrodes colored in red show significance for the comparison specified on the left side of the figure.
